# Supplementary material for: Evaluation of GBLUP and Bayes-Alphabet Based on Different Marker Density For Genomic Prediction in Alpine Merino Sheep
Source: Research Square preprint supplement (doi:10.21203/rs.3.rs-167352/v1), 2021-02-04
Supplement: Supplementary file 1 [file 9c1934843b4975e065454ef2.docx]

**Table 3.** Estimates of additive and residual components of variance obtained adopting ‘BGLR’ for different datasets

| **Traitsa** | **Dataset Type** | **(S.E)** | **(S.E)b** | **(S.E.)** |
| --- | --- | --- | --- | --- |
| CFWR | L-Datasets | 26.47(0.33) | 0.56(0.01) | 20.77(0.24) |
|  | H-Datasets | 23.04(0.26) | 0.46(0.01) | 27.06(0.25) |
| SS | L-Datasets | 28.64(0.42) | 0.46(0.01) | 33.46(0.35) |
|  | H-Datasets | 23.20(0.43) | 0.35(0.01) | 42.53(0.38) |
| FER | L-Datasets | 9.04(0.17) | 0.37(0.02) | 16.75(0.16) |
|  | H-Datasets | 7.57(0.18) | 0.29(0.01) | 18.77(0.18) |
| FD | L-Datasets | 1.91(0.03) | 0.45(0.02) | 2.26(0.02) |
|  | H-Datasets | 2.04(0.03) | 0.44(0.01) | 2.46(0.02) |
| FD_CV | L-Datasets | 5.46(0.06) | 0.56(0.01) | 4.13(0.05) |
|  | H-Datasets | 5.75(0.08) | 0.55(0.01) | 4.65(0.06) |
| SL | L-Datasets | 89.63(0.72) | 0.70(0.01) | 37.73(0.55) |
|  | H-Datasets | 106.99(0.86) | 0.68(0.01) | 50.64(0.76) |

a CFWR: clean fleece weight rate; SS: staple strength; FER: fleece extension rate; FD: mean fiber diameter; FD_CV: Coefficient of variation of FD; SL: staple length

b Polygenic heritability, the proportion of the additive eﬀect variance to the total phenotypic variance.
